# Supplementary material for: Facile synthesis of Cu2PO4OH hierarchical nanostructures and their improved catalytic activity by a hydroxyl group
Source: Royal Society of Chemistry journal article supplement (doi:10.1039/c5ra18164j), 2015-01-01
Supplement: c5ra18164j1.pdf [file c5ra18164j1.pdf]

# Facile synthesis of $\text{Cu}_2\text{PO}_4\text{OH}$ hierarchical nanostructures and the improved catalytic activity by hydroxyl group †

Yunxuan Zhao,<sup>a</sup> Fei Teng,<sup>a\*</sup> Juan Xu,<sup>a</sup> Zailun Liu,<sup>a</sup> Yang Yang,<sup>a</sup> Qiqi Zhang,<sup>a</sup> Wenqing Yao<sup>b</sup>

<sup>a</sup> *Jiangsu Engineering and Technology Research Center of Environmental Cleaning Materials (ECM), Jiangsu Key Laboratory of Atmospheric Environment Monitoring and Pollution Control (AEMPC), Jiangsu Joint Laboratory of Atmospheric Pollution Control (APC), Collaborative Innovation Center of Atmospheric Environment and Equipment Technology (AEEET), School of Environmental Science and Engineering, Nanjing University of Information Science & Technology, 219 Ningliu Road, Nanjing 210044, China.*

<sup>b</sup> *Department of Chemistry, Tsinghua University, Beijing 100084, China*

**Table 1** The band gap ( $E_g$ ), VBM ( $E_{VB}$ ) and CBM ( $E_{CB}$ ) of  $\text{Cu}_2\text{PO}_4\text{OH}$ .

| Chemicals                         | * $X(eV)$ | $E_g(eV)$ | $E_{VB}(eV)$ | * $E_{CB}(eV)$ |
|-----------------------------------|-----------|-----------|--------------|----------------|
| $\text{Cu}_2\text{PO}_4\text{OH}$ | 6.47      | 2.82      | 3.38         | 0.56           |

\*Notes:  $X$ , the geometric mean of Mulliken's electronegativities;  $E_g$ , band gap; VBM, valence band maximum; CBM, conduction band minimum.

The positions of conduction and valence bands ( $E_{CB}$ ,  $E_{VB}$ ) are calculated by Eq. 2 and 3 as follows.

$$E_{CB}=X - E_e - 0.5E_g \quad (2)$$

$$E_{VB}=X - E_e + 0.5E_g \quad (3)$$

Where  $X$  is the geometric mean of Mulliken's electronegativities of constituent atoms,  $E_e$  is the energy of free electrons on the hydrogen scale ( $\sim 4.5 eV$ ), and  $E_g$  is the band gap.

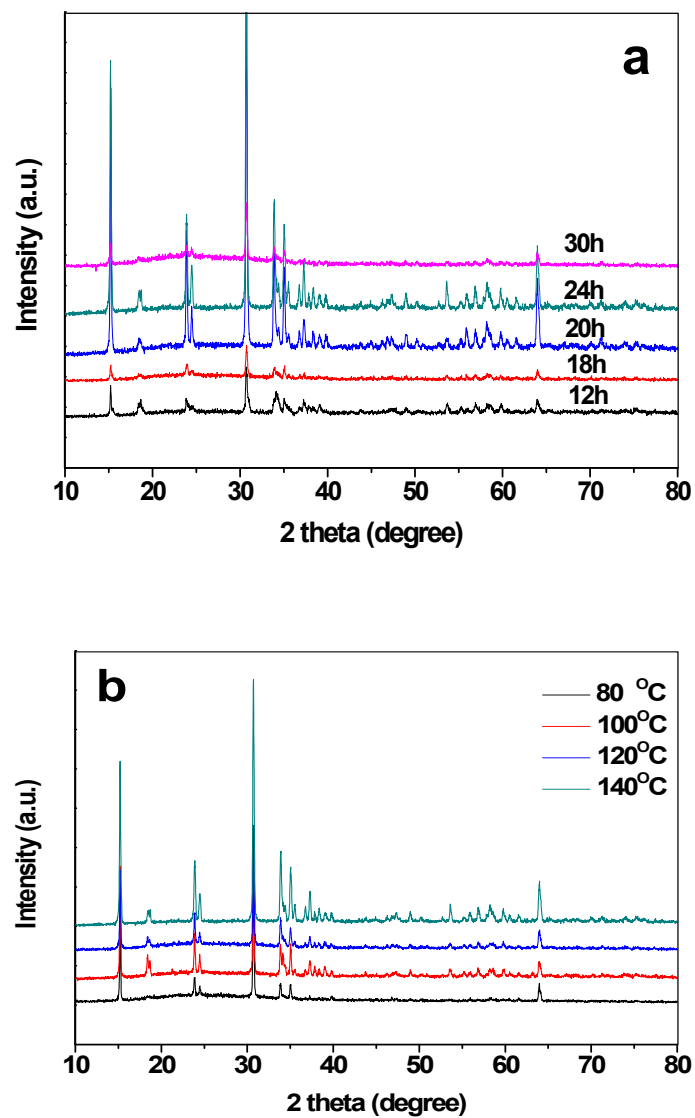

**Fig. S1** X-ray diffraction (XRD) patterns of the samples synthesized at different reaction times (a) and temperatures (b).

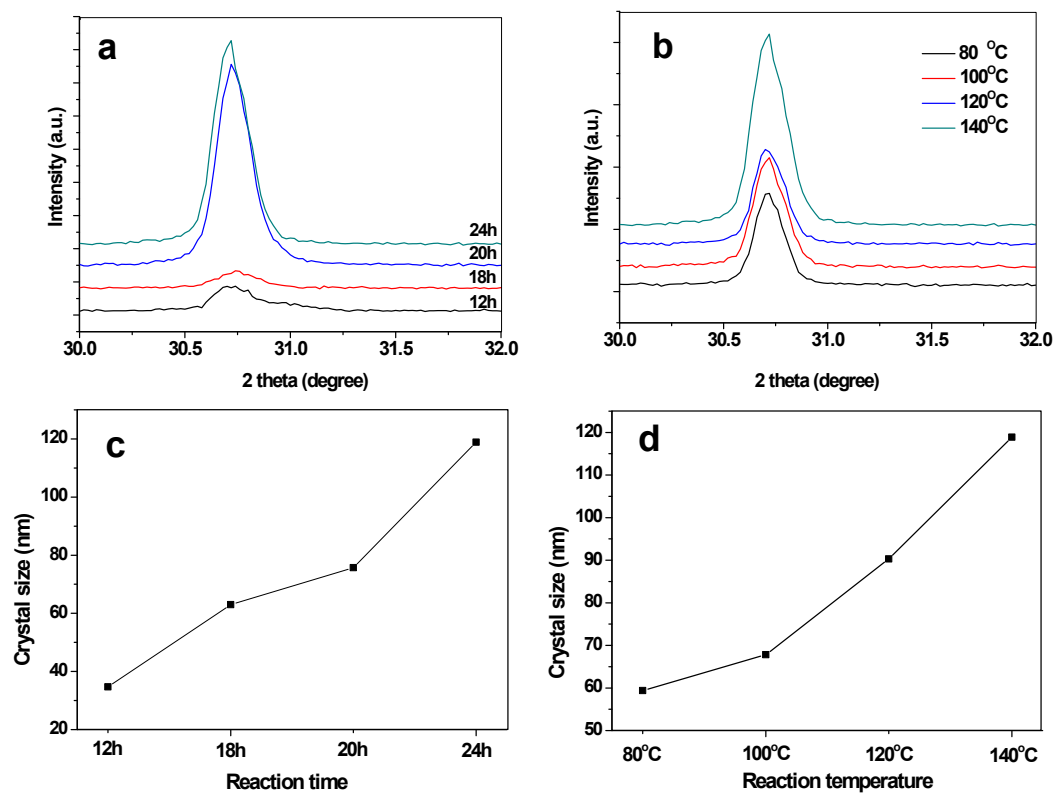

**Fig. S2** (220) diffraction peaks ( $30\text{--}32^\circ$ ) and average crystallite sizes calculated by Scherrer equation of  $\text{Cu}_2\text{PO}_4\text{OH}$  obtained at different reaction times (a,c) and temperatures (b,d).

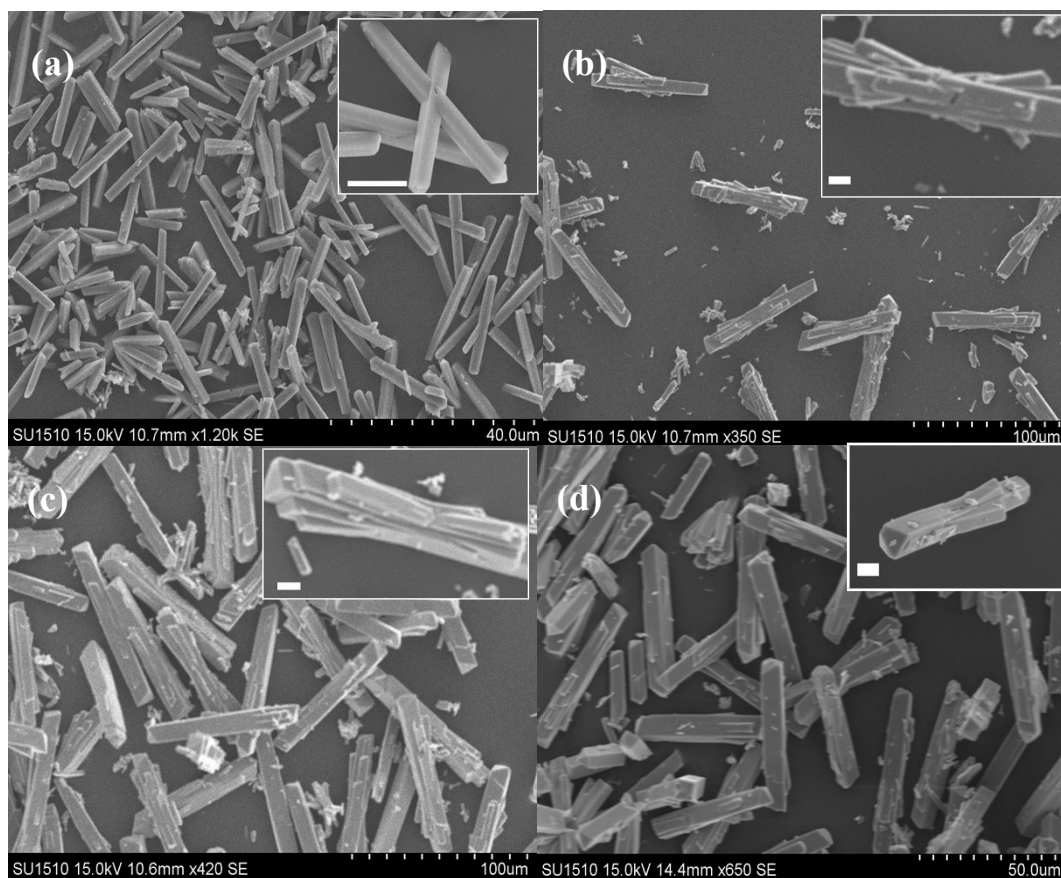

**Fig. S3** SEM images of the samples prepared at different reaction times: (a) 12 h; (b) 18 h; (c) 20 h; (d) 24 h; Scale bar = 5  $\mu\text{m}$ .

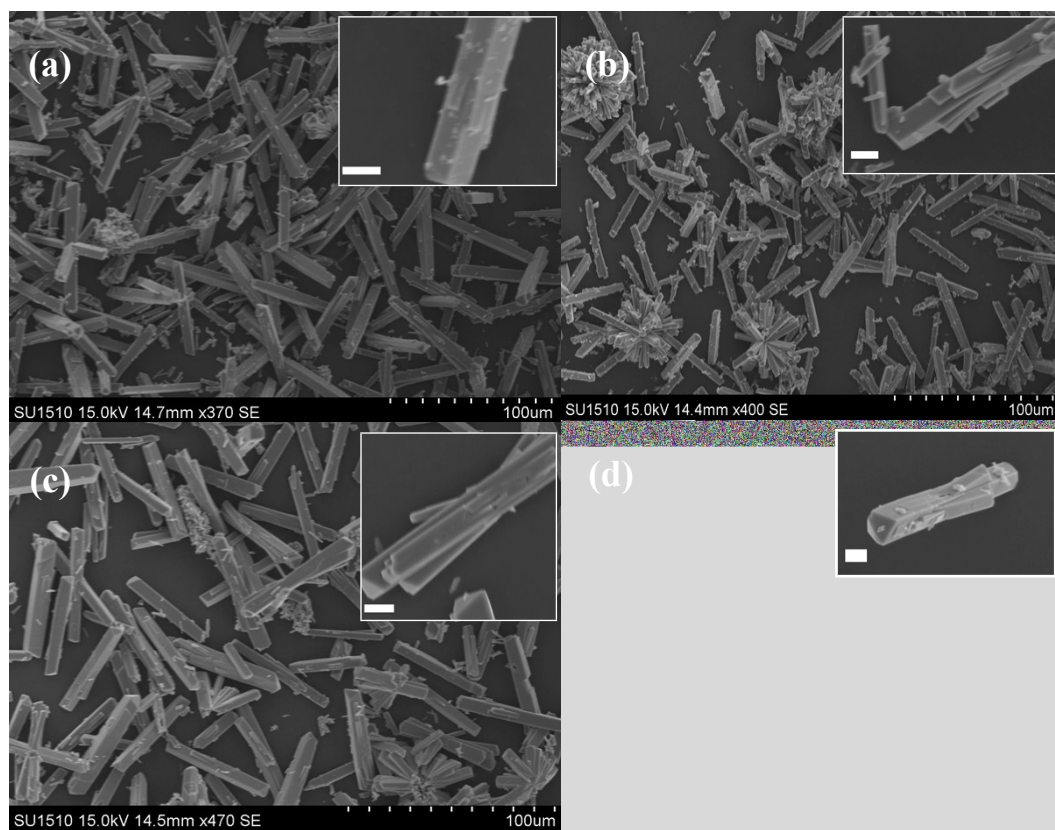

**Fig. S4** SEM images of the samples prepared at different reaction temperatures: (a) 80 °C; (b) 100 °C; (c) 120 °C; (d) 140 °C; Scale bar = 5  $\mu\text{m}$ .

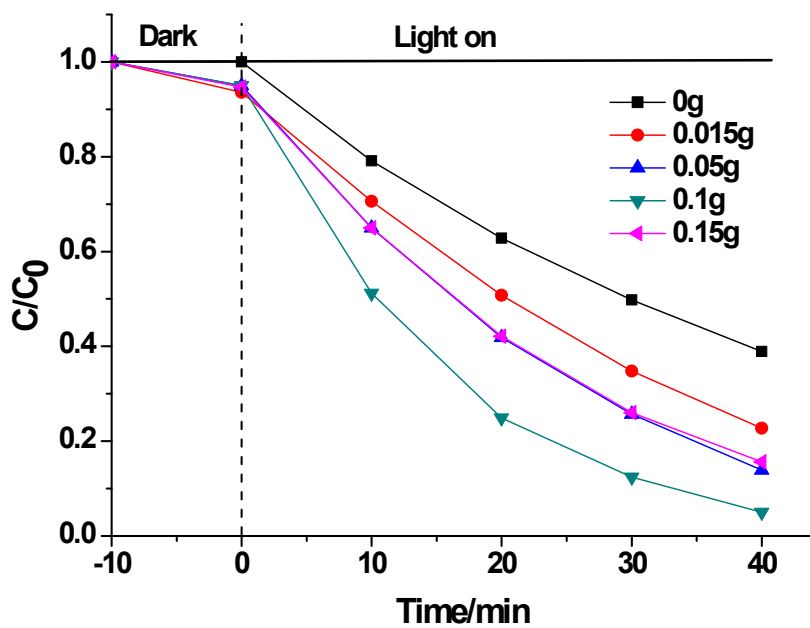

**Fig. S5** Effect of catalyst loading on the catalytic degradation of RhB over S-Cu<sub>2</sub>PO<sub>4</sub>OH in the presence of H<sub>2</sub>O<sub>2</sub> under UV irradiation ( $\lambda \leq 420$  nm).

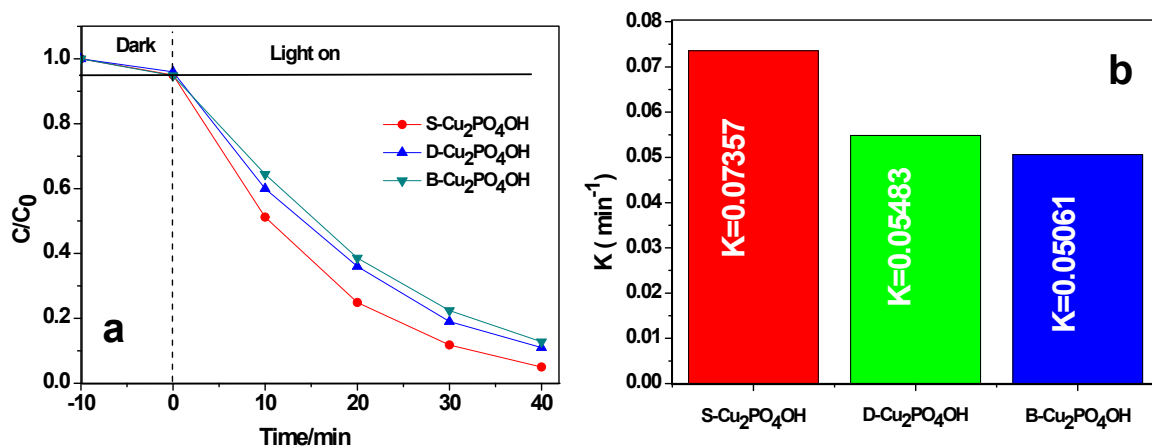

**Fig. S6** Degradation curves (a) and apparent reaction kinetic constants (b) of the samples for the degradation of rhodamine B (RhB) in the presence of H<sub>2</sub>O<sub>2</sub> under UV irradiation ( $\lambda \leq 420$  nm).



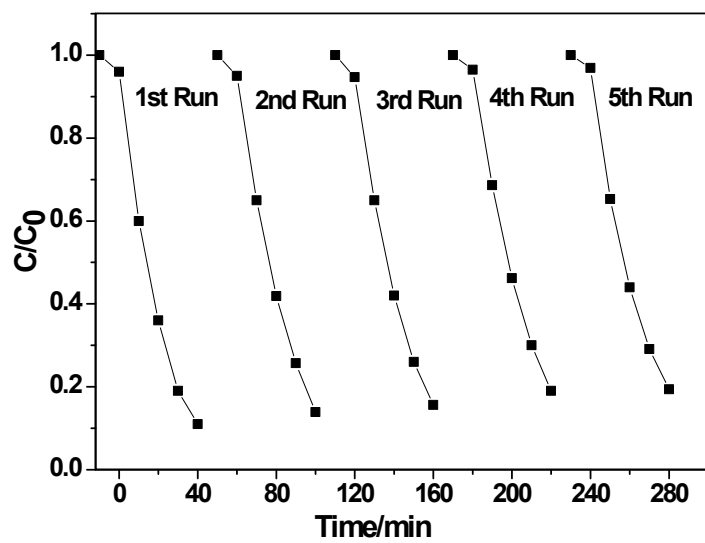

**Fig. S7** The cycle experiment of S-Cu<sub>2</sub>PO<sub>4</sub>OH for the degradation of rhodamine B (RhB) in the presence of H<sub>2</sub>O<sub>2</sub> under UV irradiation.

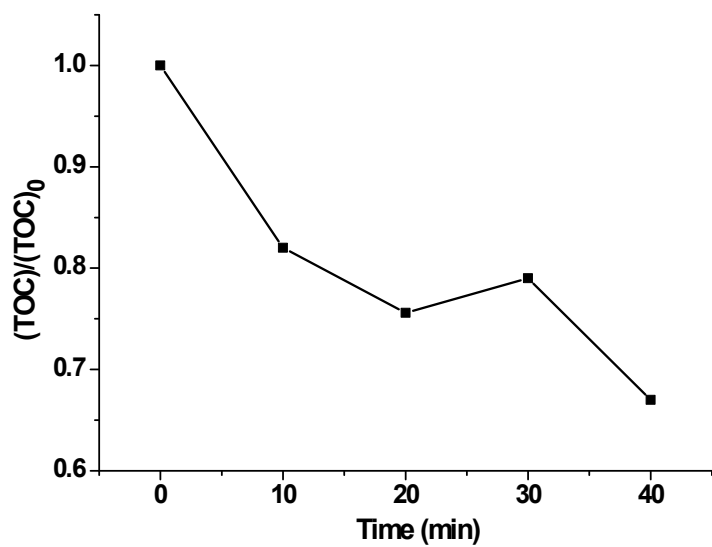

**Fig. S8** Changes of TOC during the degradation of RhB over S-Cu<sub>2</sub>PO<sub>4</sub>OH in the presence of H<sub>2</sub>O<sub>2</sub> under UV irradiation ( $\lambda \leq 420$  nm).
